# Supplementary material for: Room temperature photo-induced phase transitions of VO2 nanodevices
Source: Royal Society of Chemistry journal article supplement (doi:10.1039/c0jm03203d), 2011-01-01
Supplement: c0jm03203d.pdf [file c0jm03203d.pdf]

## Supplementary Information

### Room Temperature Photo-induced Phase Transitions of VO<sub>2</sub> Nanodevices

Jyh Ming Wu and Lian Bang Liou

Department of Material Science and Engineering, Feng Chia University, 100

Wenhwa Rd., Seatwen, Taichung 40724, Taiwan.

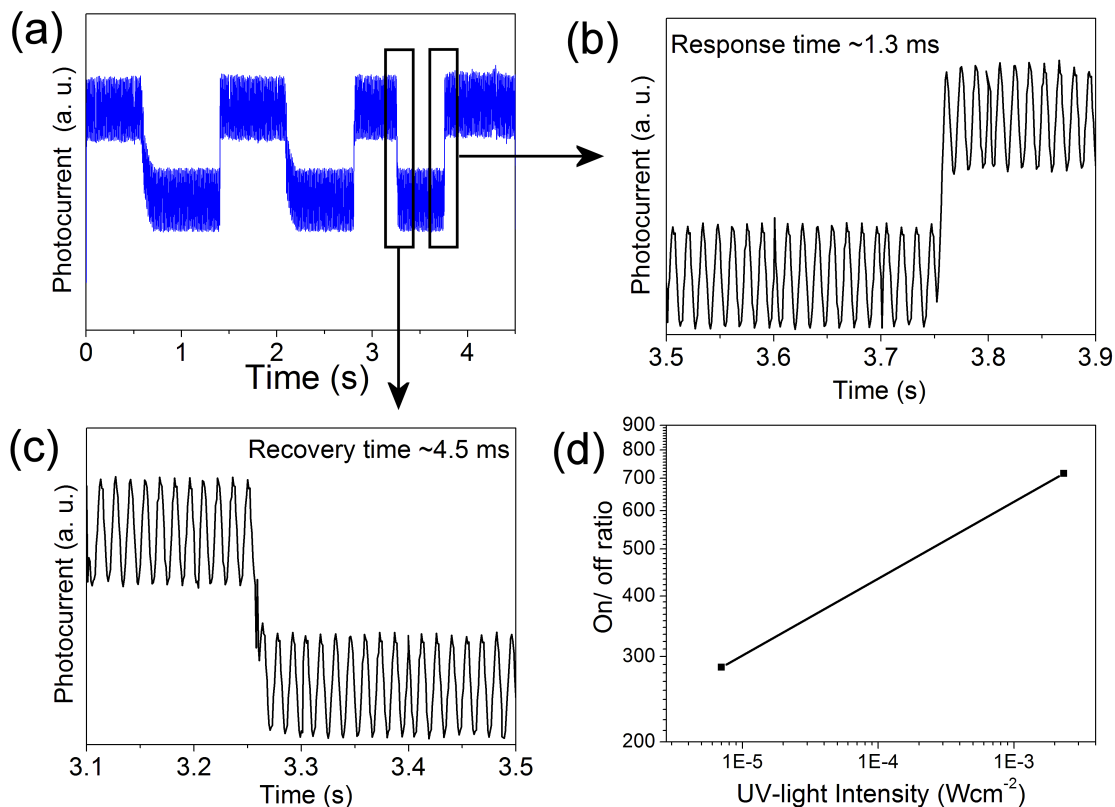

Figure S1 (a)-(c) Response curve and recovery curve, as time-resolution increased to 1 kHz, under UV-light ( $7\mu\text{Wcm}^{-2}$ ) irradiation. (d) The UV-light intensity dependence of the photoresponse.
